# Supplementary material for: Efficient high-throughput sequencing of a laser microdissected chromosome arm
Source: PubMed Central journal article supplement (PMC3701504; doi:10.1186/1471-2164-14-357), 2013-05-28

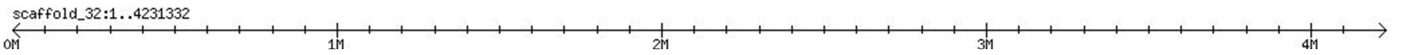

solexa\_hit

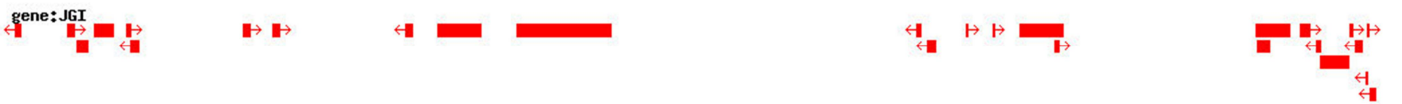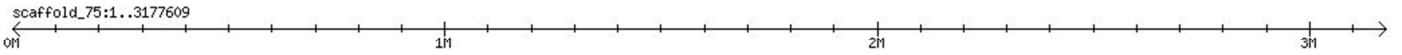

solexa\_hit

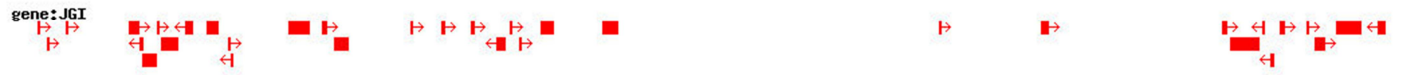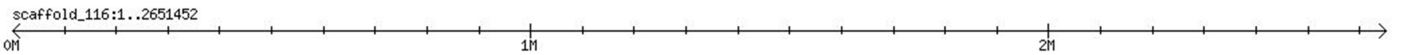

gene:JGI

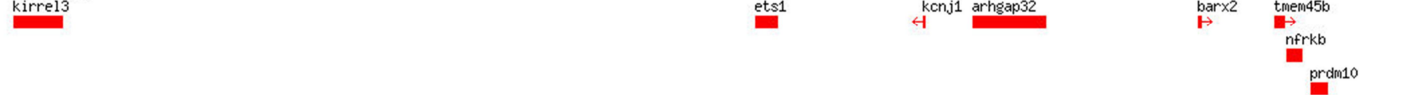

solexa\_hit

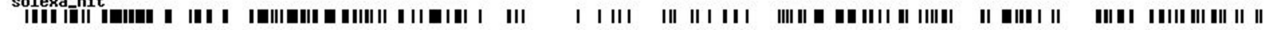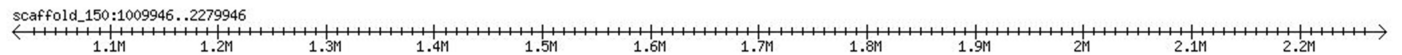

gene:JGI

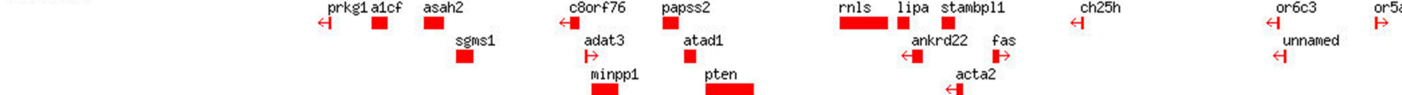

solexa\_hit

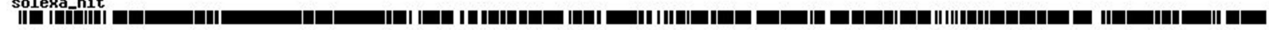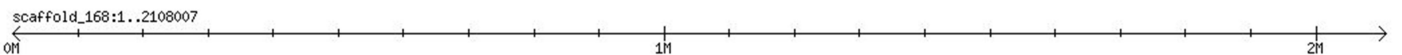

gene:JGI

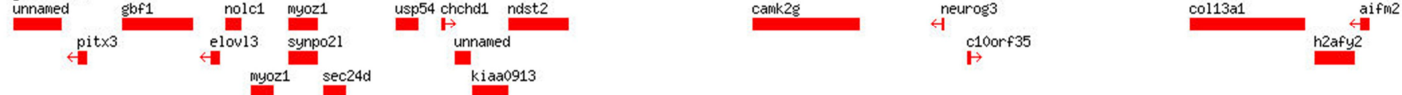

solexa\_hit

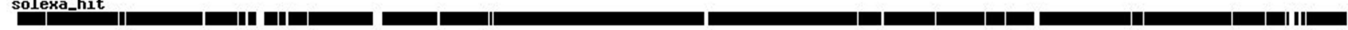

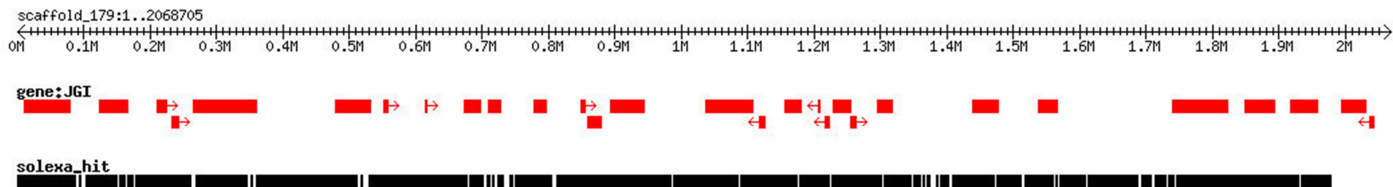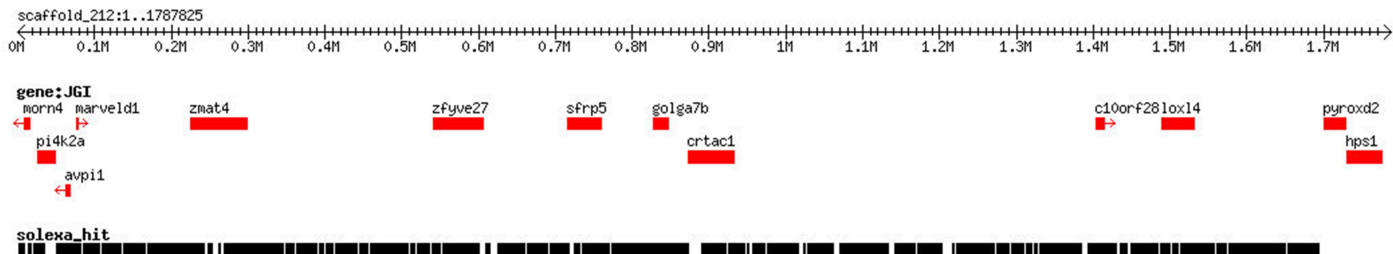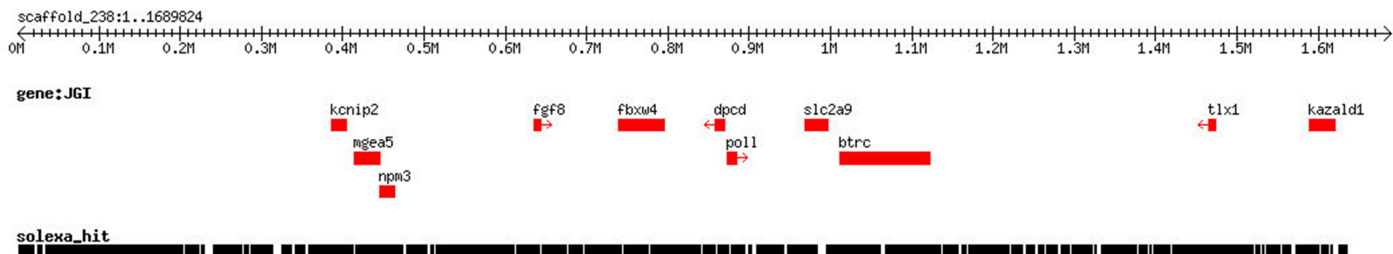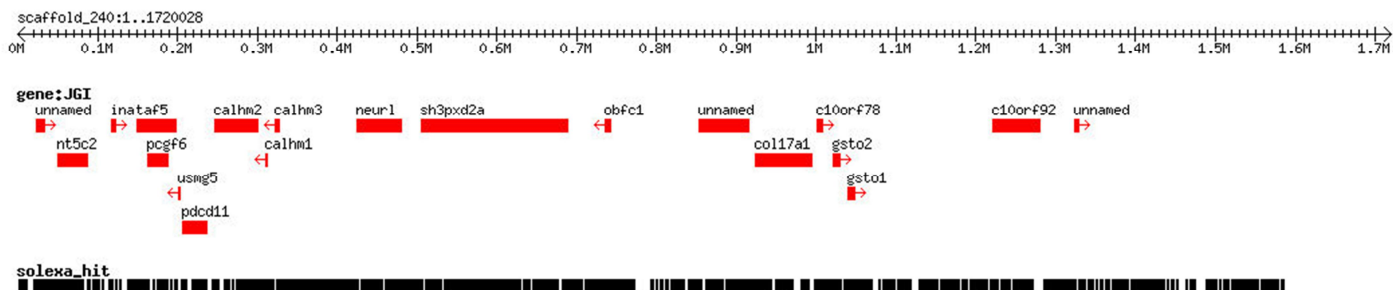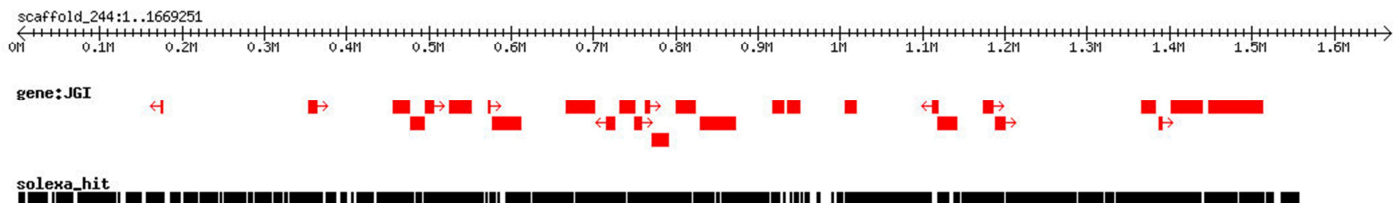

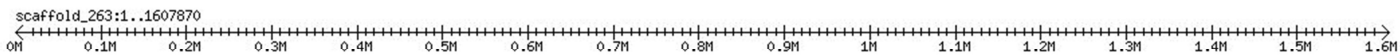

gene:JGI

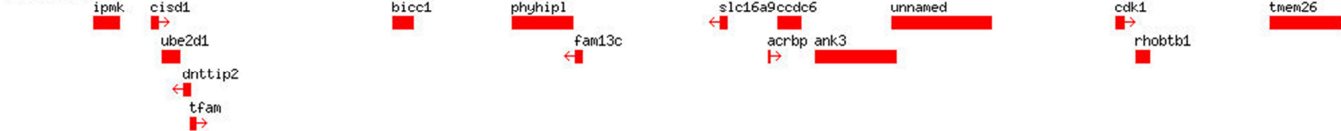

solexa\_hit

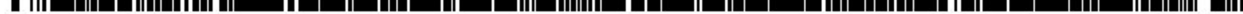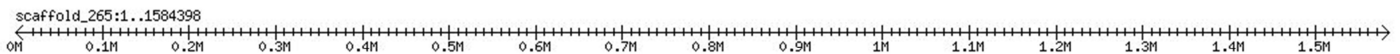

gene:JGI

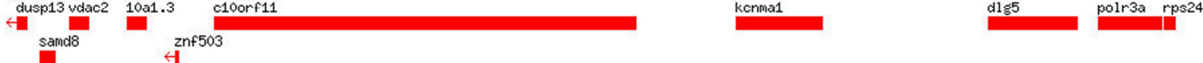

solexa\_hit

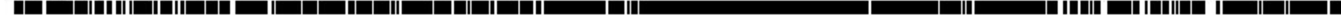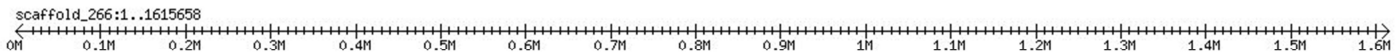

gene:JGI

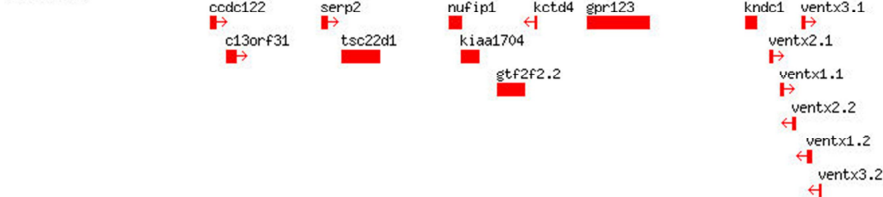

solexa\_hit

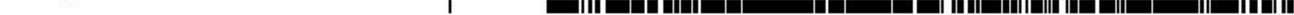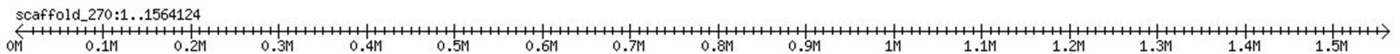

gene:JGI

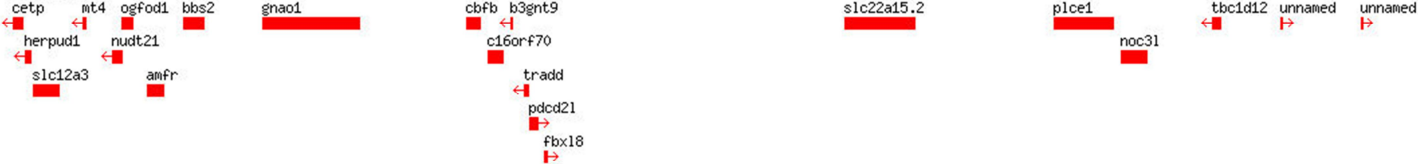

solexa\_hit

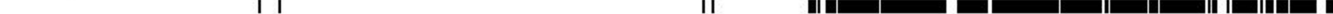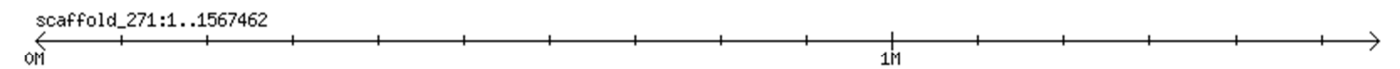

gene:JGI

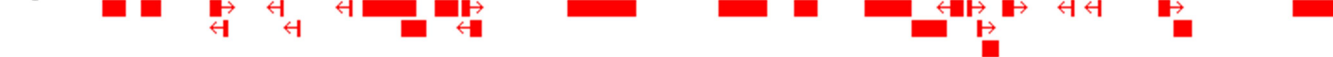

solexa\_hit

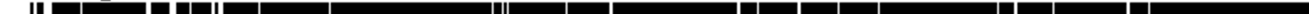

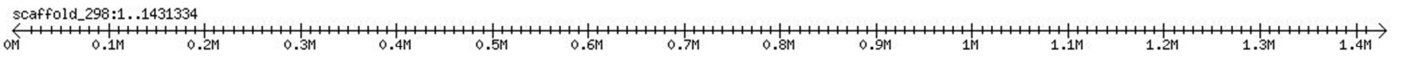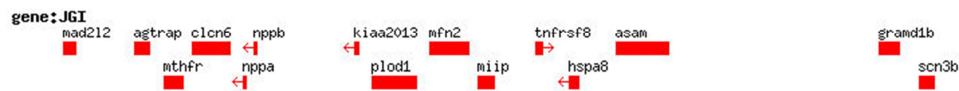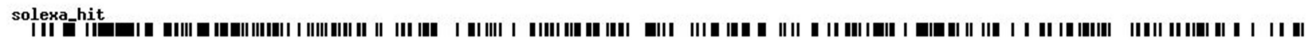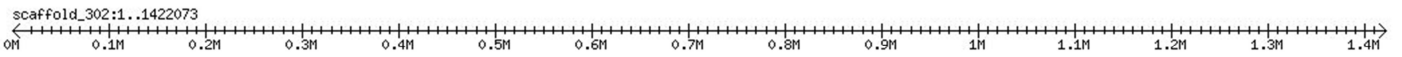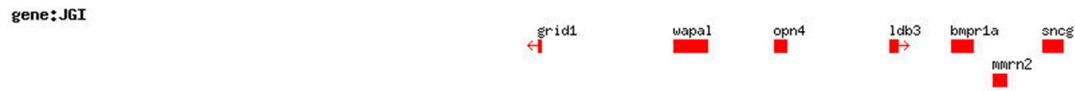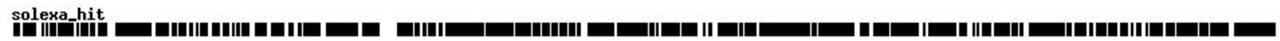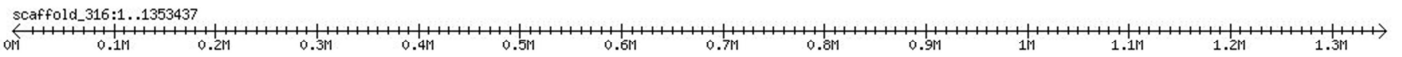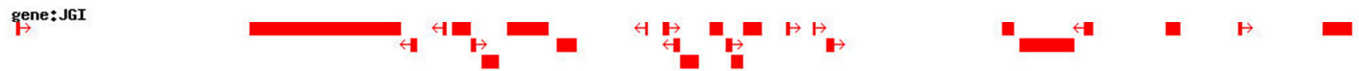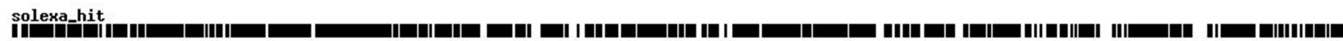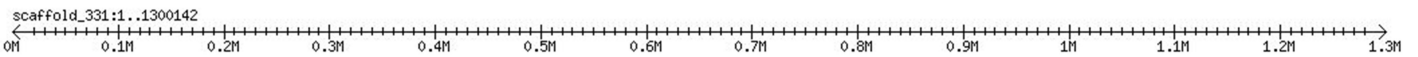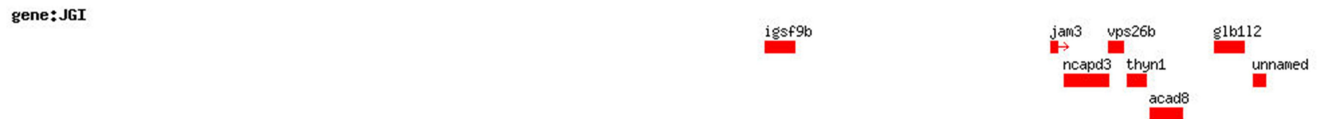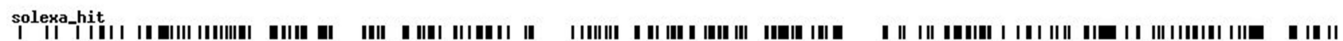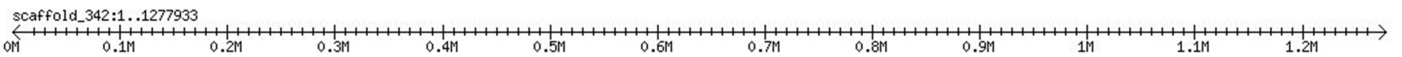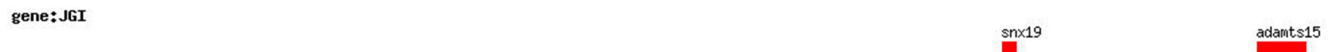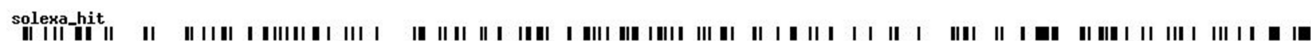

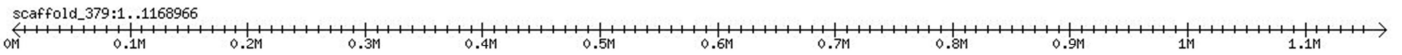

gene:JGI

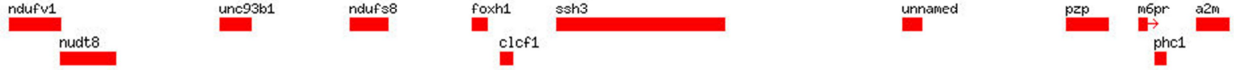

solexa\_hit

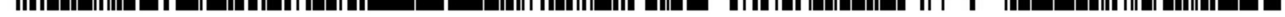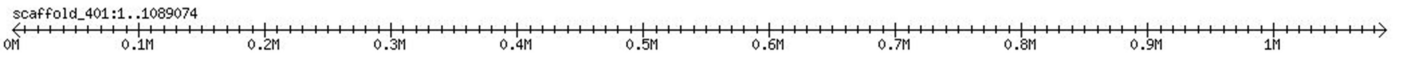

gene:JGI

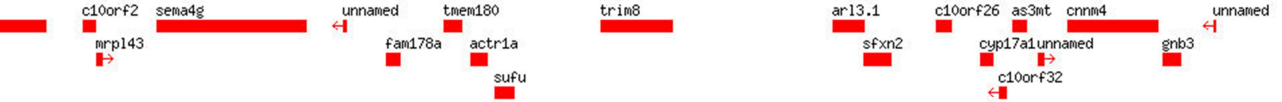

solexa\_hit

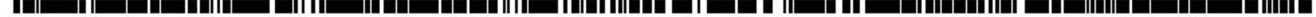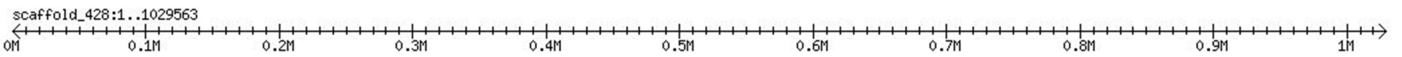

gene:JGI

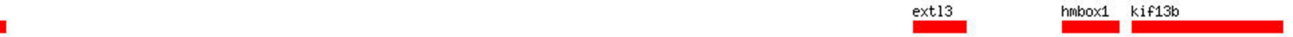

solexa\_hit

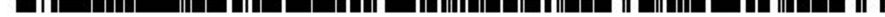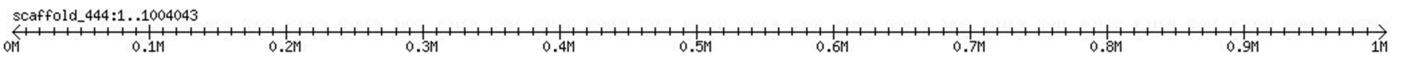

gene:JGI

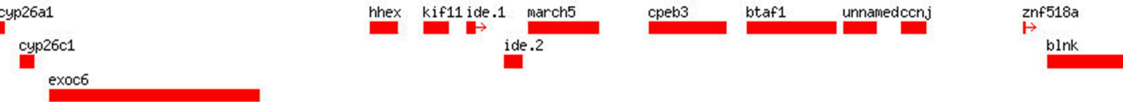

solexa\_hit

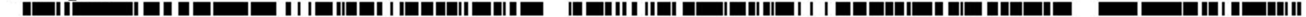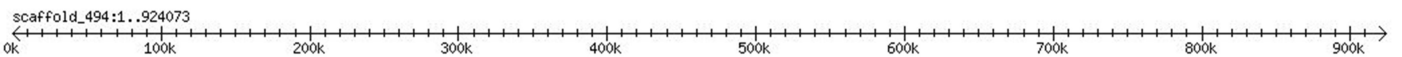

gene:JGI

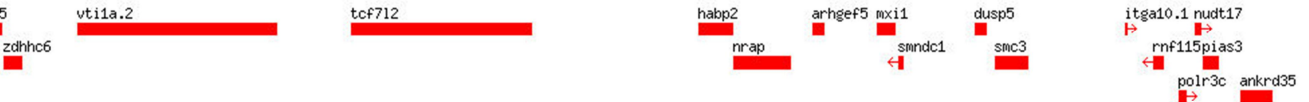

solexa\_hit

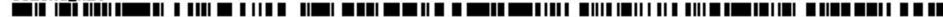

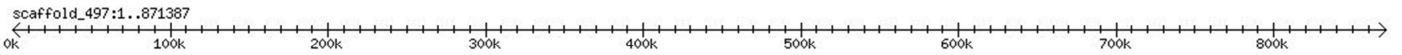

gene:JGI

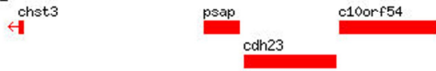

solexa\_hit

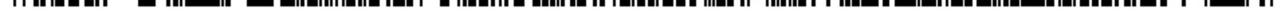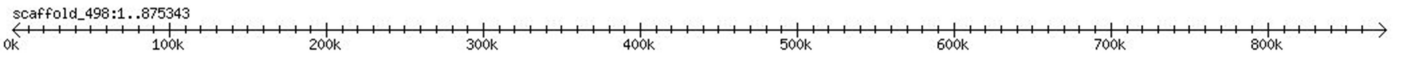

gene:JGI

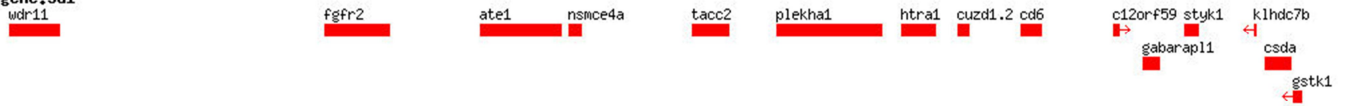

solexa\_hit

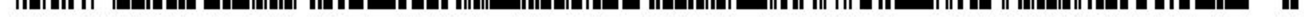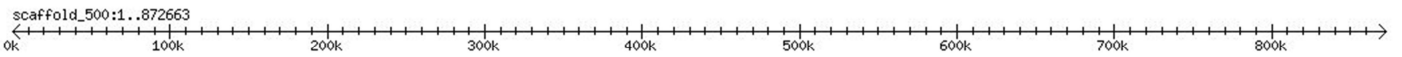

gene:JGI

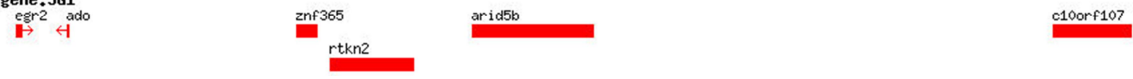

solexa\_hit

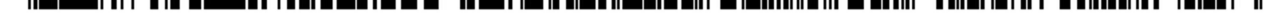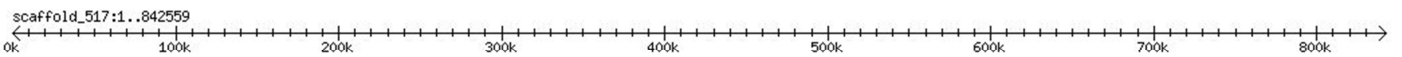

gene:JGI

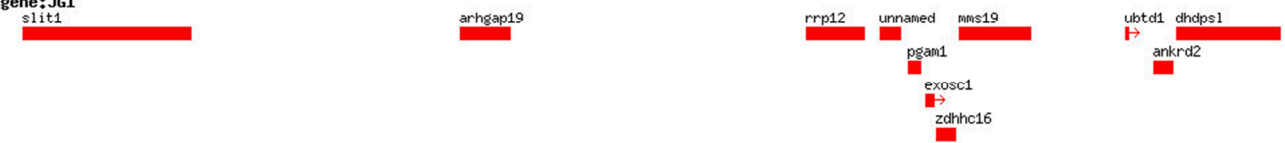

solexa\_hit

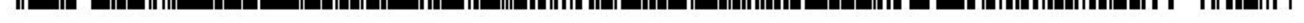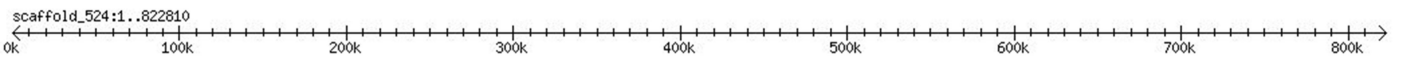

gene:JGI

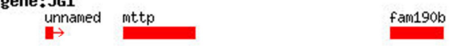

solexa\_hit

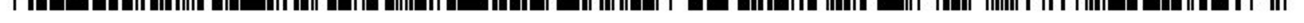

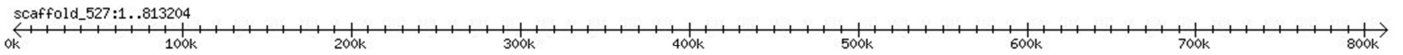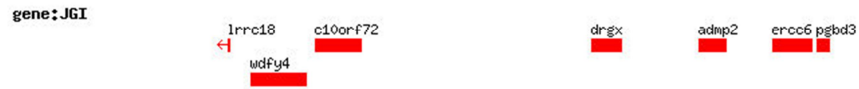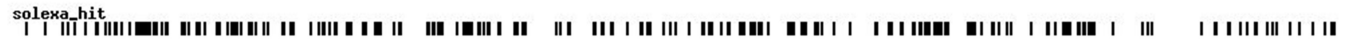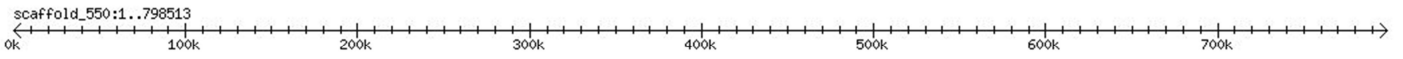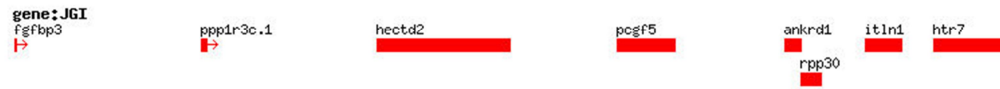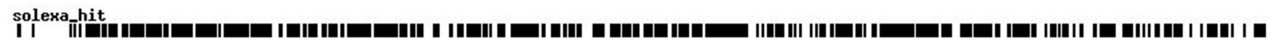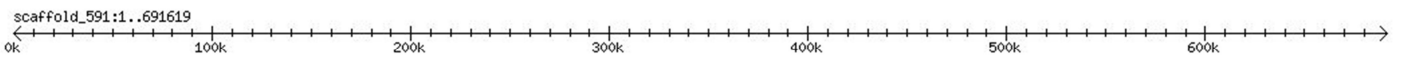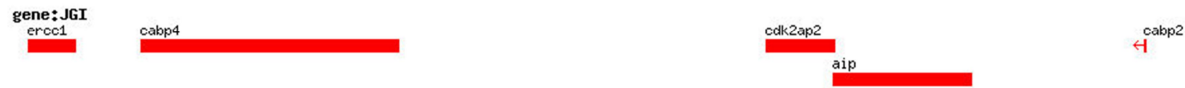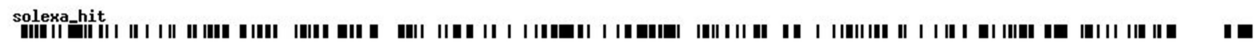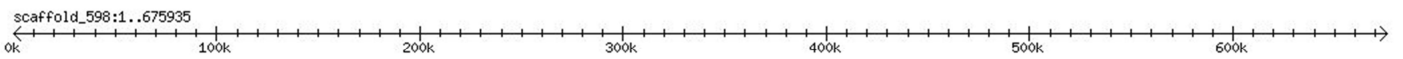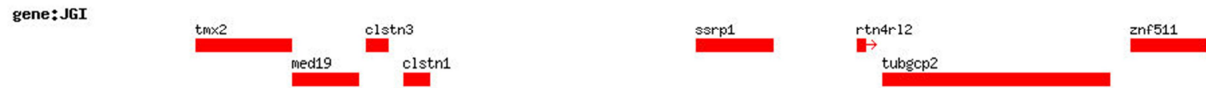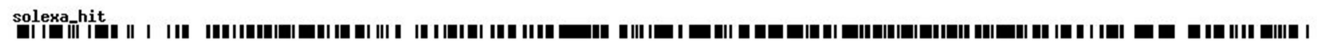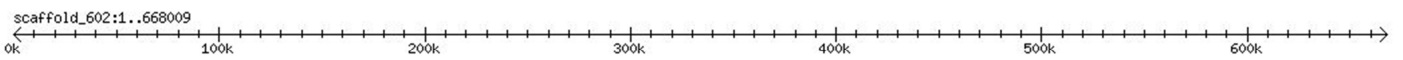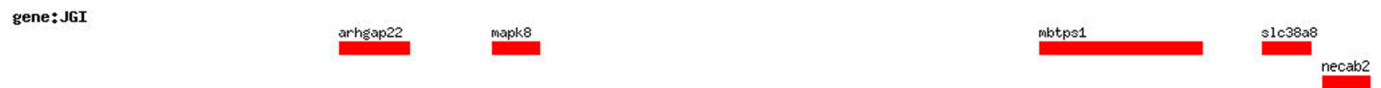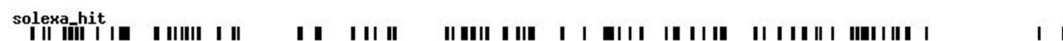

scaffold\_618:5533..637533

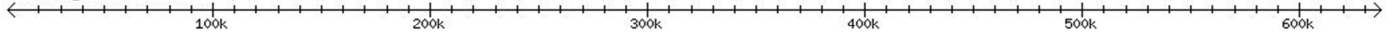

gene:JGI

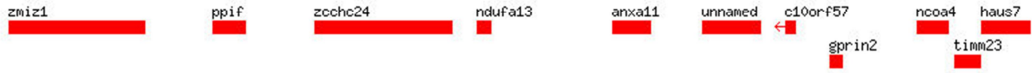

solexa\_hit

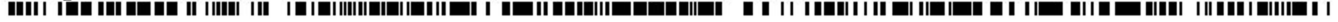

scaffold\_623:1000..623000

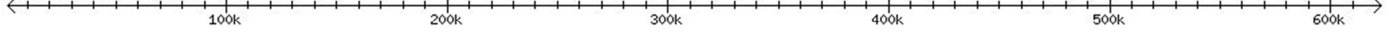

gene:JGI

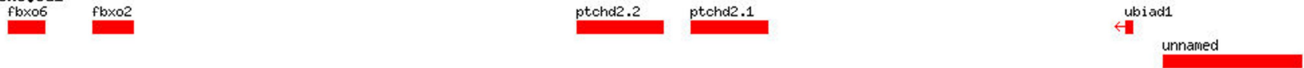

solexa\_hit

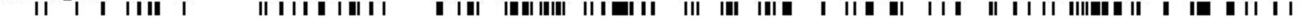

scaffold\_640:1..601120

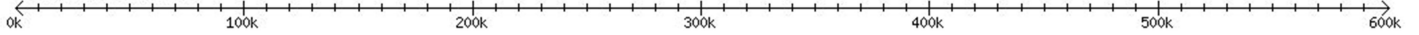

gene:JGI

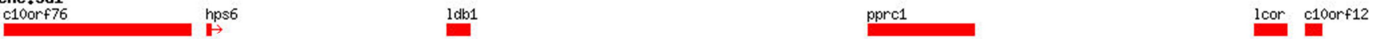

solexa\_hit

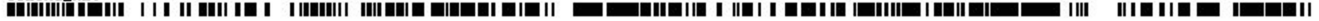

scaffold\_652:1..584498

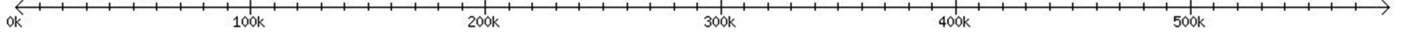

gene:JGI

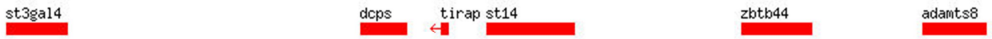

solexa\_hit

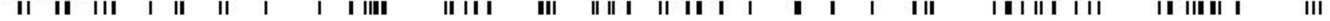

scaffold\_653:1..582802

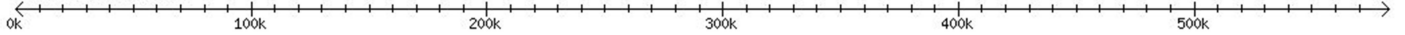

gene:JGI

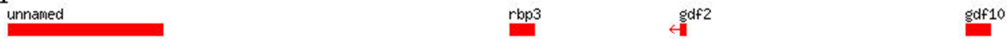

solexa\_hit

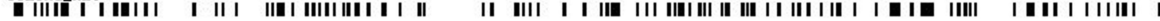

scaffold\_670:1..562044

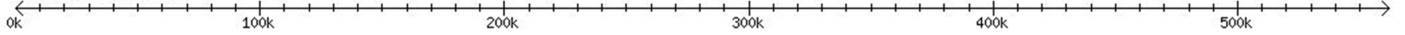

gene:JGI

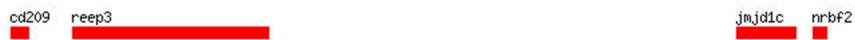

solexa\_hit

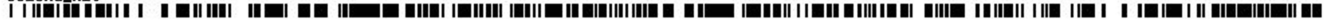



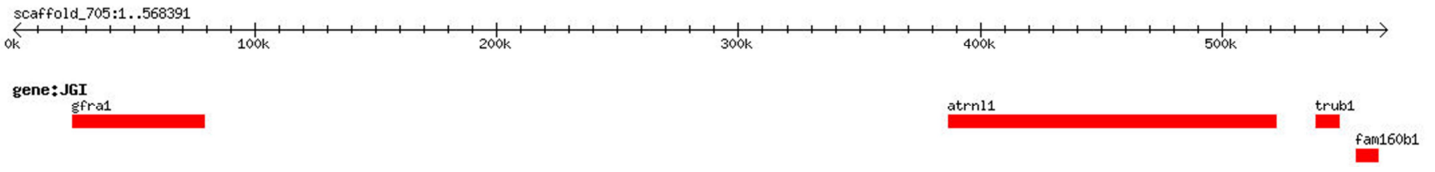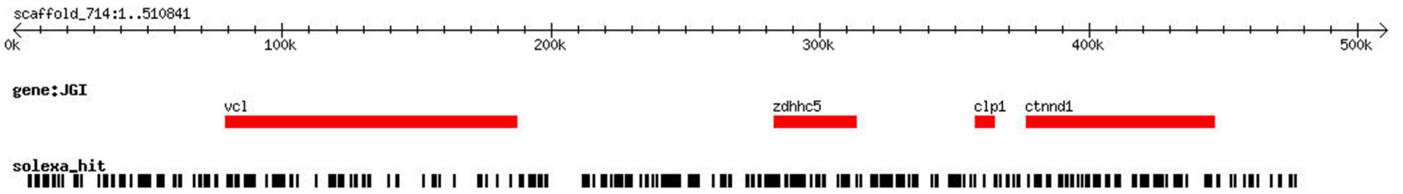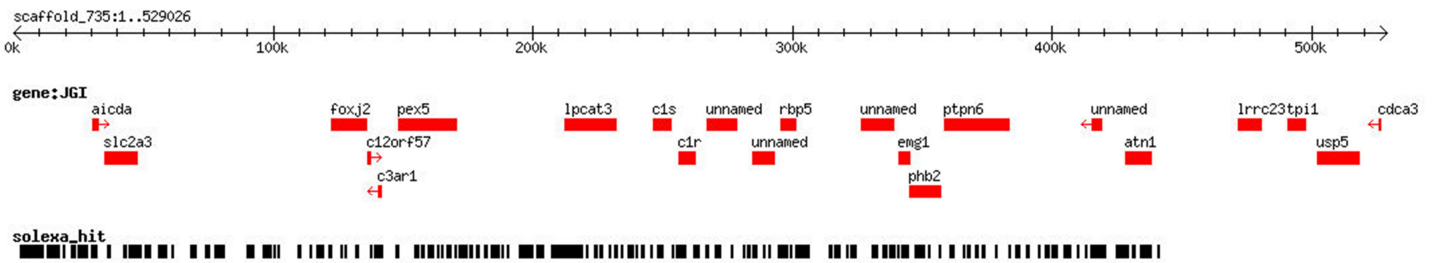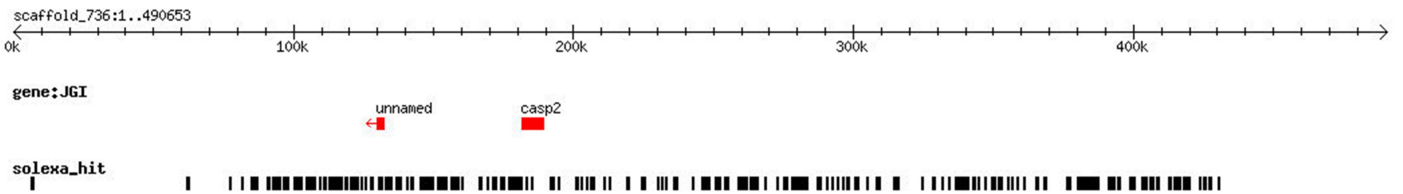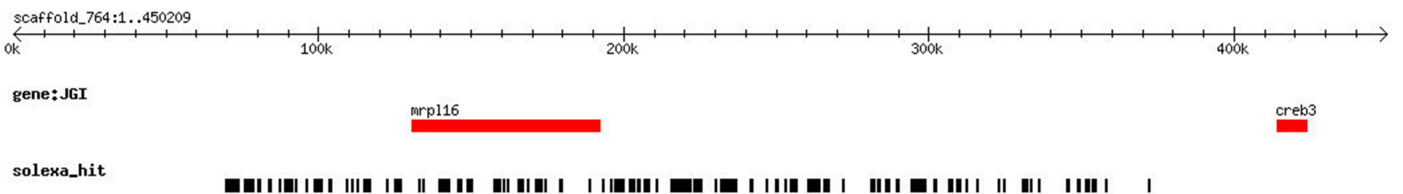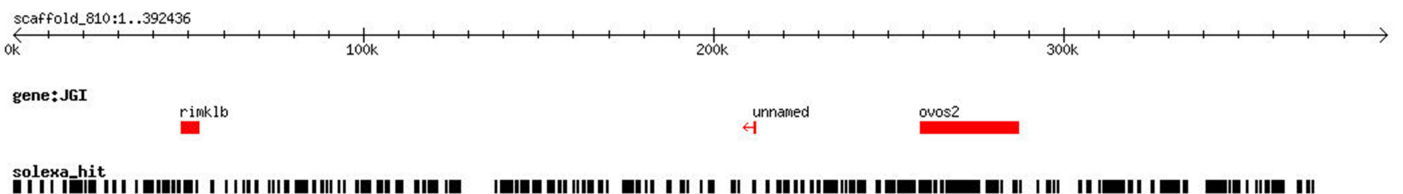

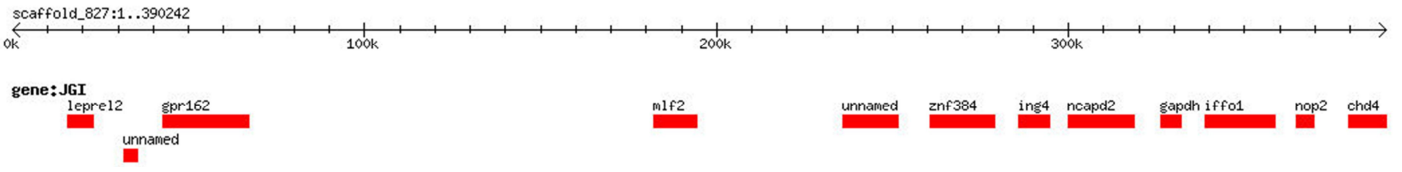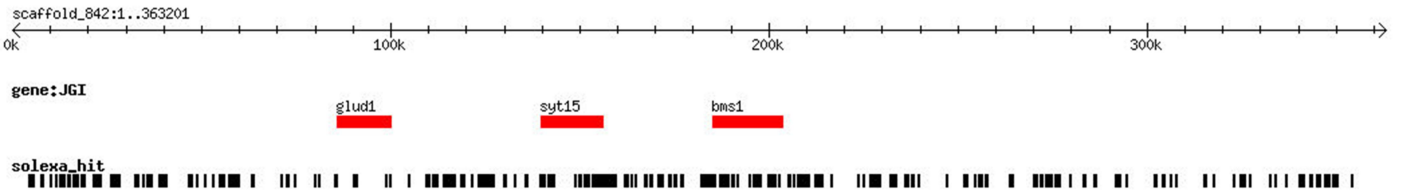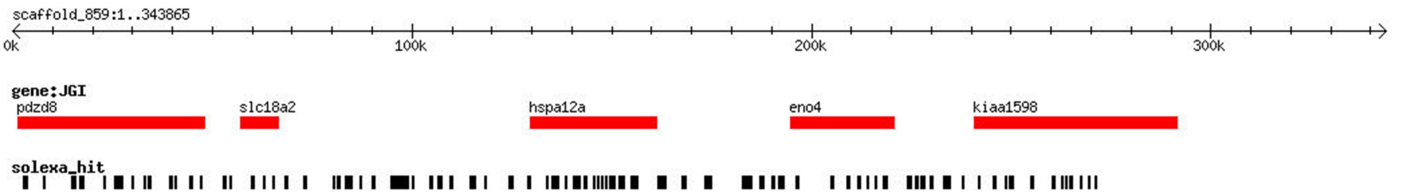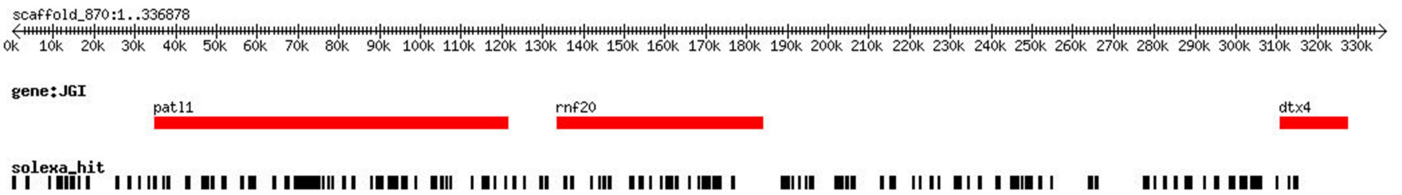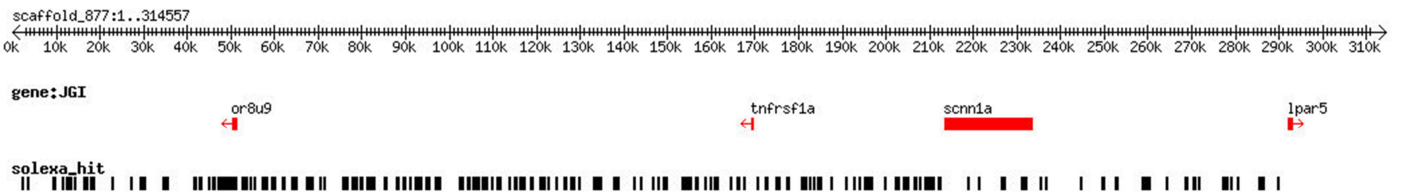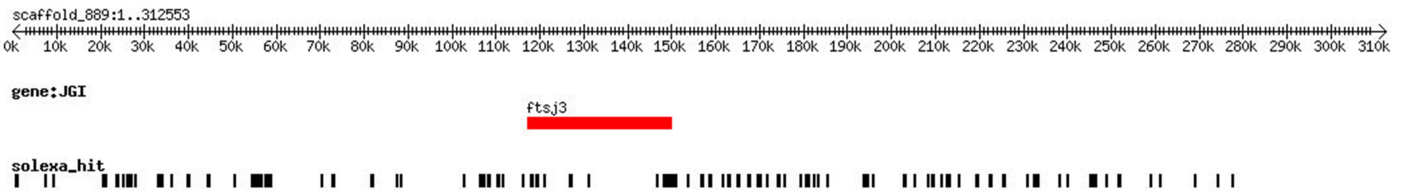

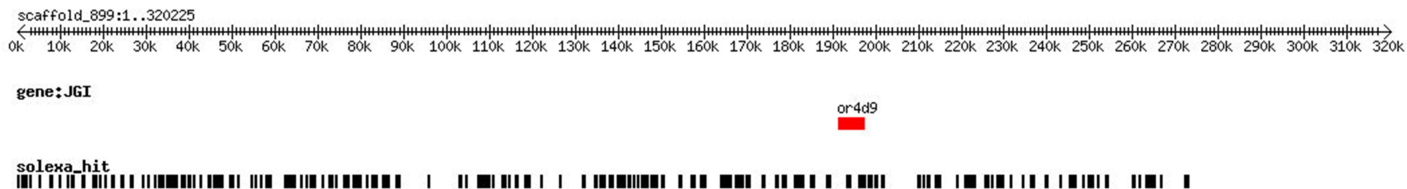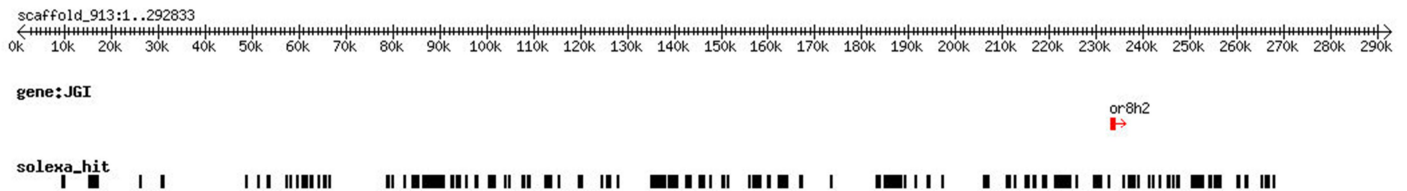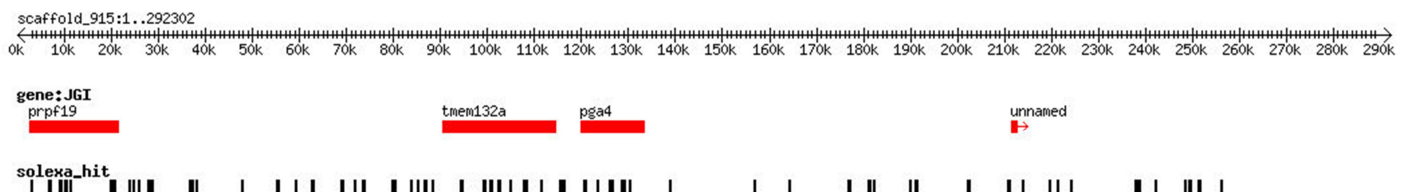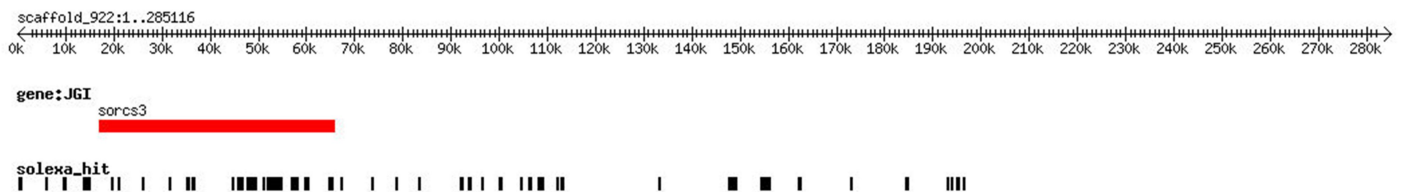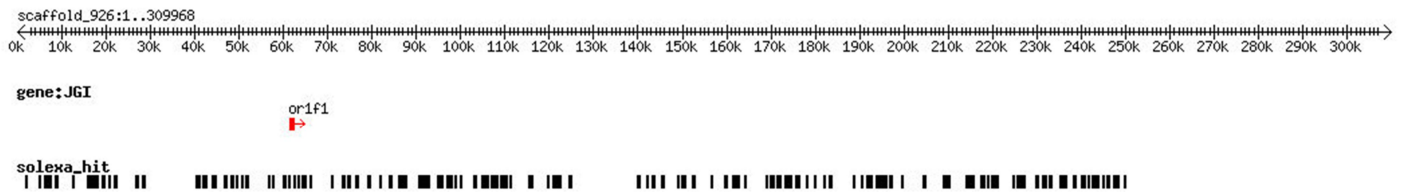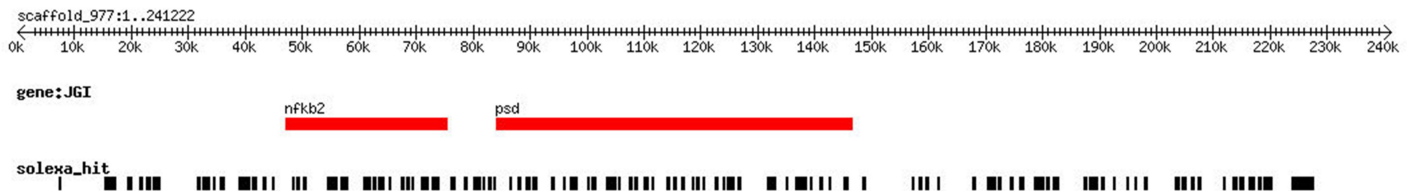

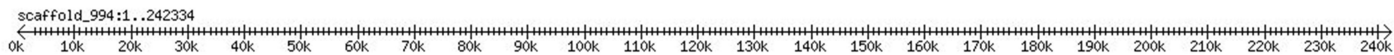

gene:JGI

cxcl12

solexa\_hit

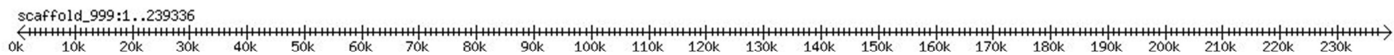

gene:JGI

solexa\_hit

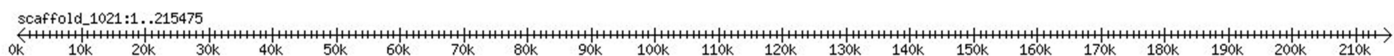

gene:JGI

echs1

erlin1

slc43a1

solexa\_hit

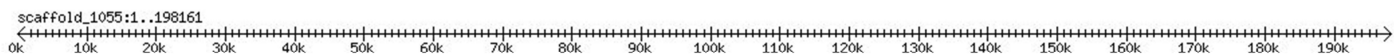

gene:JGI

solexa\_hit

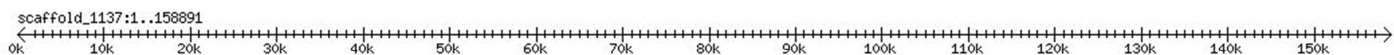

gene:JGI

shoc2

unnamed

rbb20

pdcd4

solexa\_hit

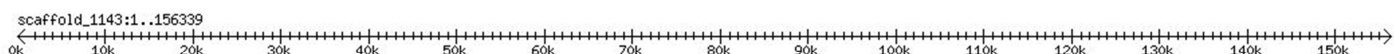

gene:JGI

adcy5

iqch1

ccdc147

itrip

tectb

solexa\_hit

scaffold\_1153:1..151181  
← 0k 10k 20k 30k 40k 50k 60k 70k 80k 90k 100k 110k 120k 130k 140k 150k →

gene:JGI

adk

dupd1

solexa\_hit

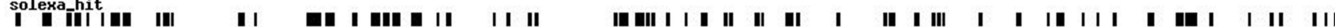

scaffold\_1225:1..125975  
← 0k 10k 20k 30k 40k 50k 60k 70k 80k 90k 100k 110k 120k →

gene:JGI

solexa\_hit

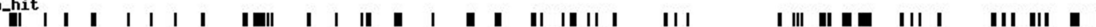

scaffold\_1246:1..118488  
← 0k 10k 20k 30k 40k 50k 60k 70k 80k 90k 100k 110k →

gene:JGI

osbp

zfp91

solexa\_hit

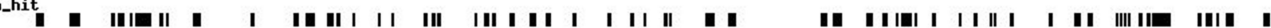

scaffold\_1293:1..106764  
← 0k 10k 20k 30k 40k 50k 60k 70k 80k 90k 100k →

gene:JGI

or5m10

or6n2

solexa\_hit

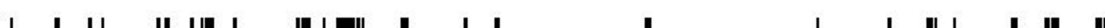

Supplement: 1471-2164-14-357-S4.pdf [file 1471-2164-14-357-S4.pdf]
