# Supplementary material for: Efficient high-throughput sequencing of a laser microdissected chromosome arm
Source: PubMed Central journal article supplement (PMC3701504; doi:10.1186/1471-2164-14-357), 2013-05-28

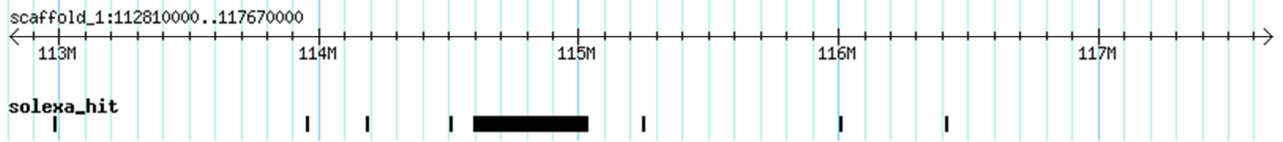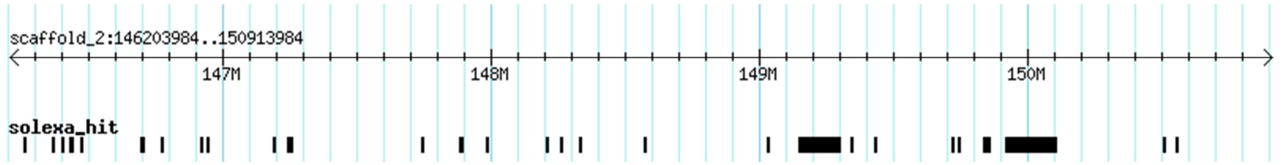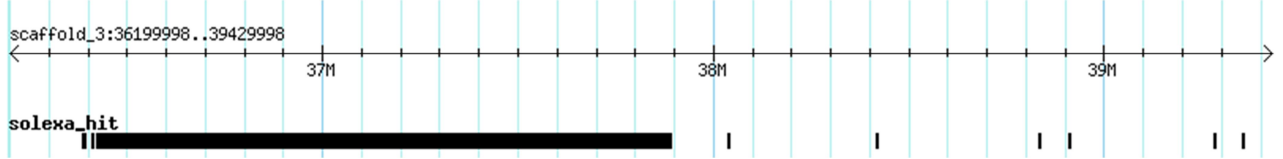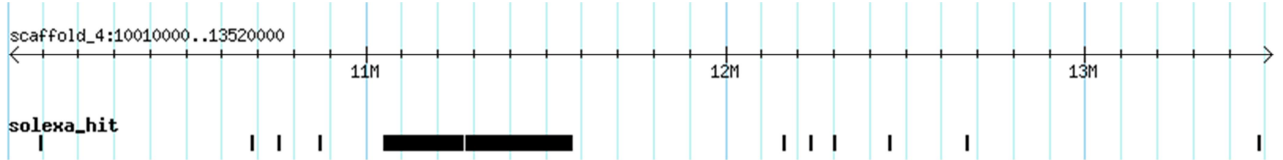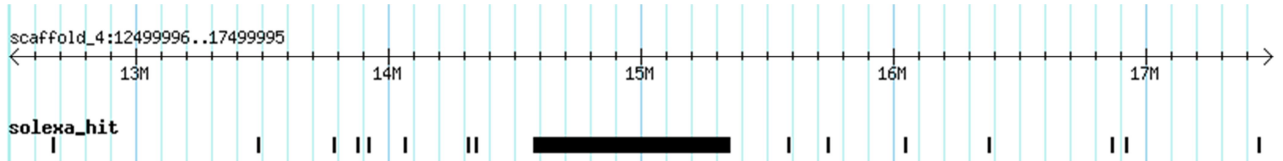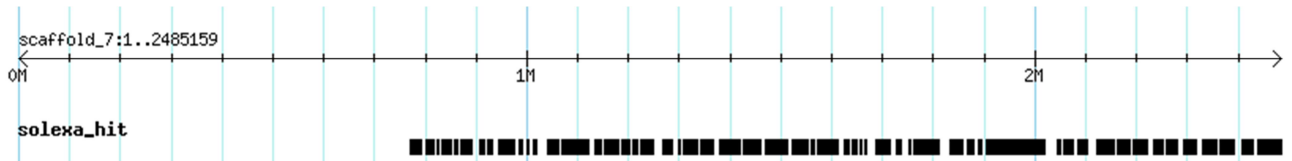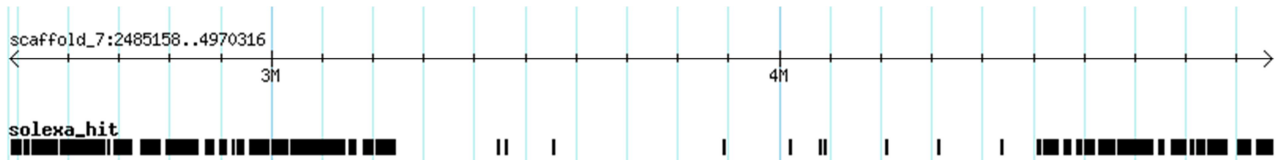

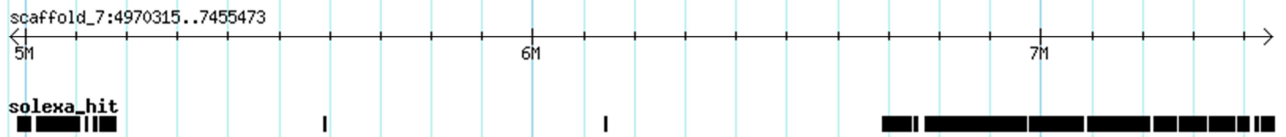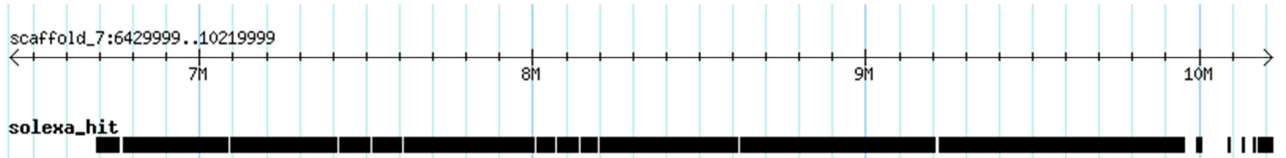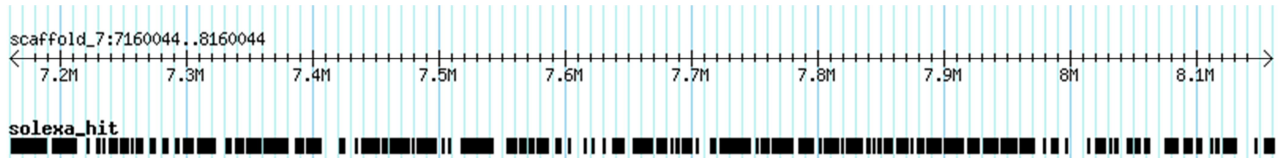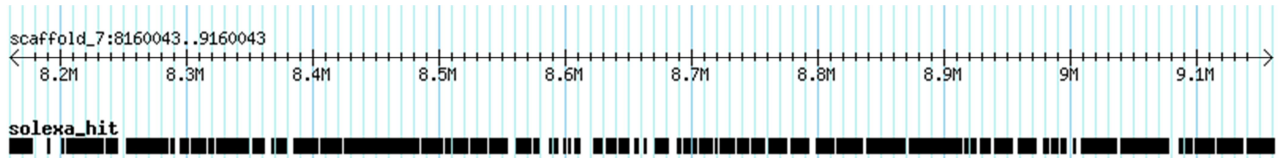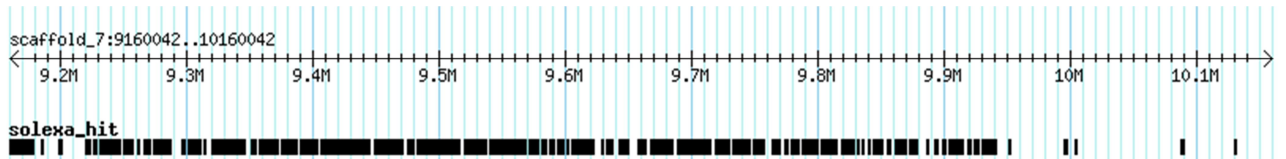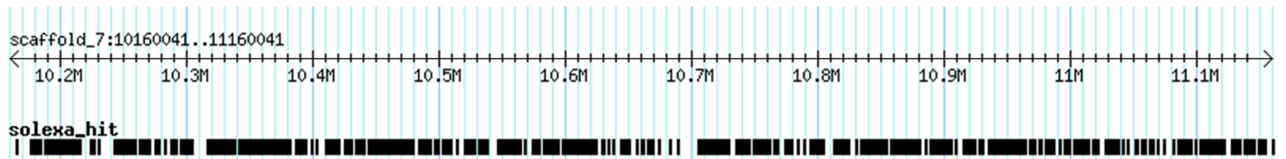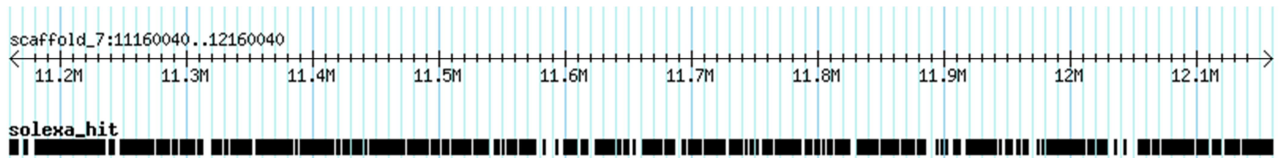

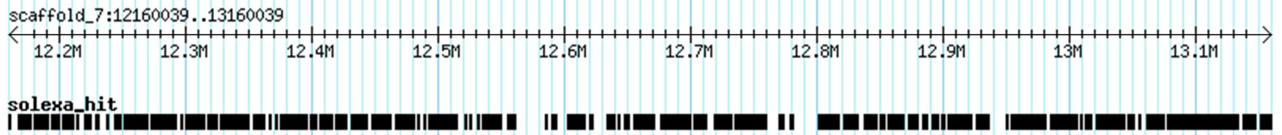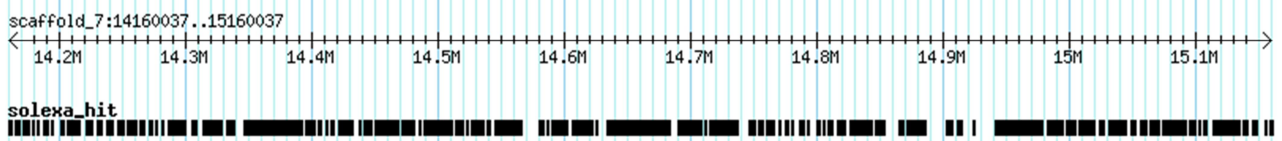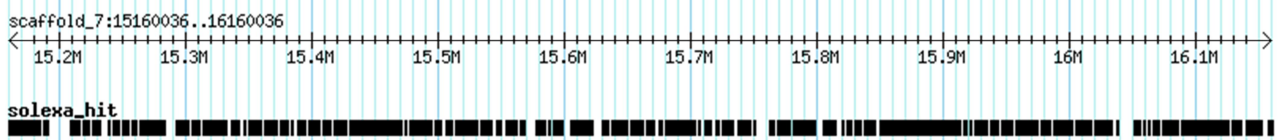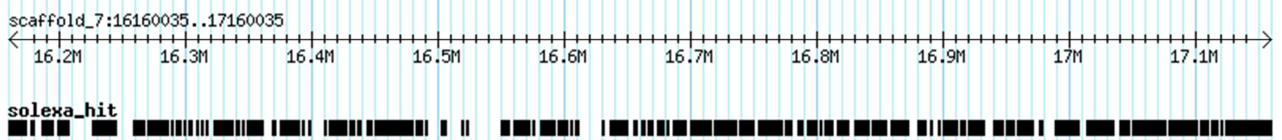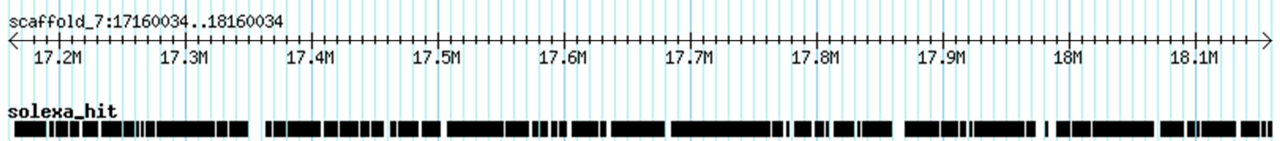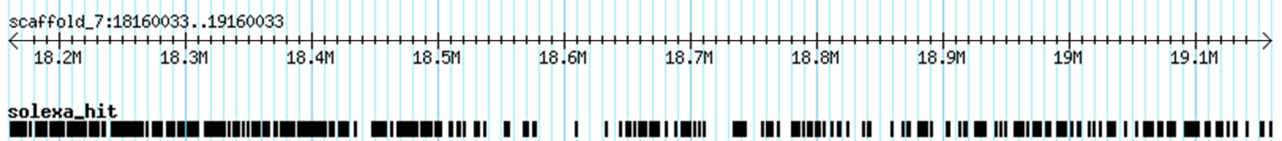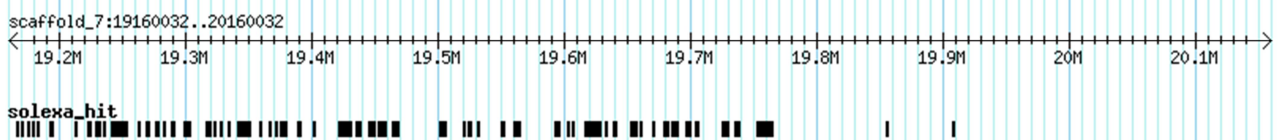

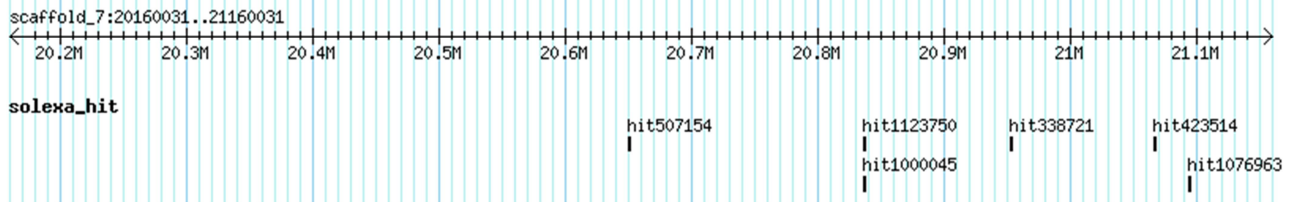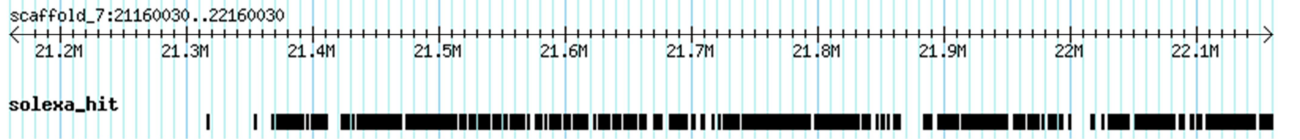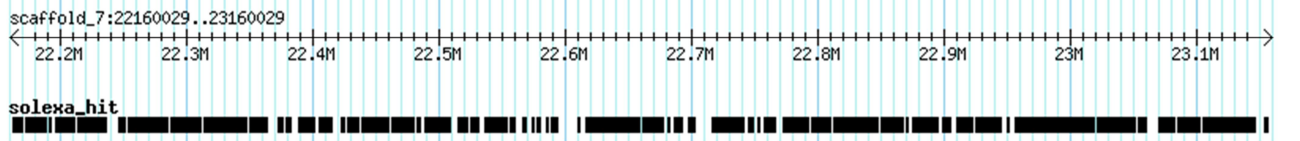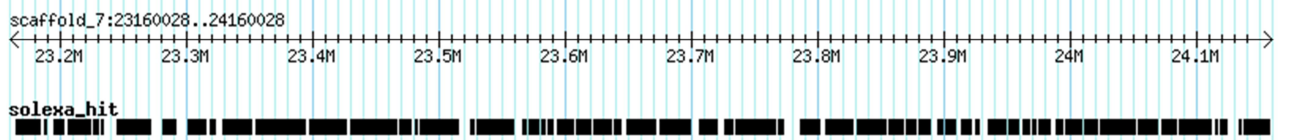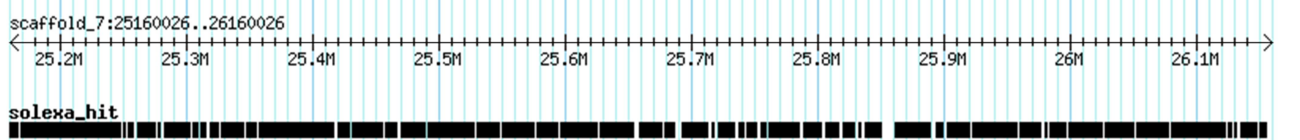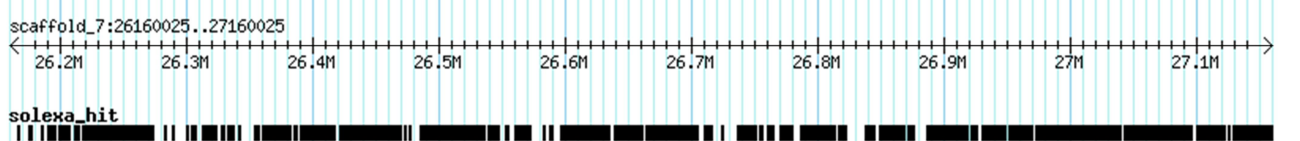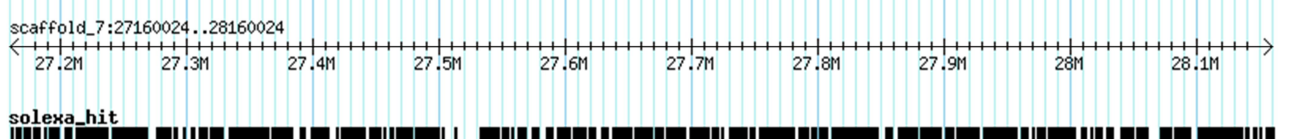

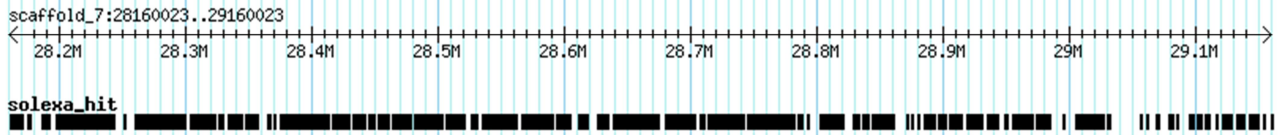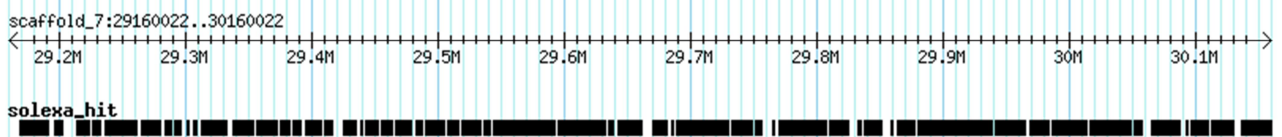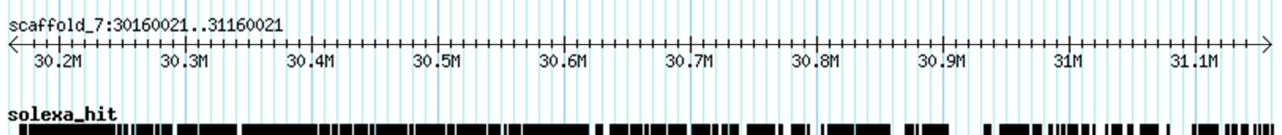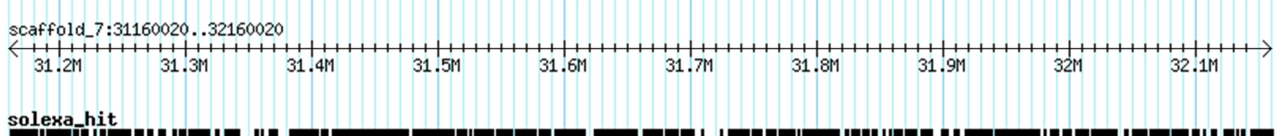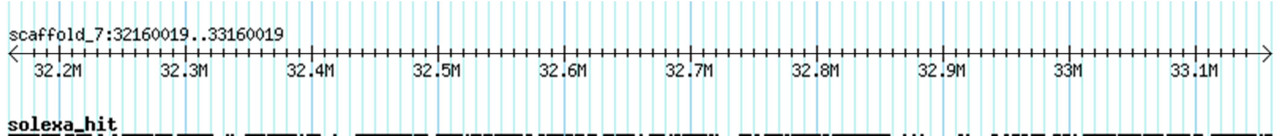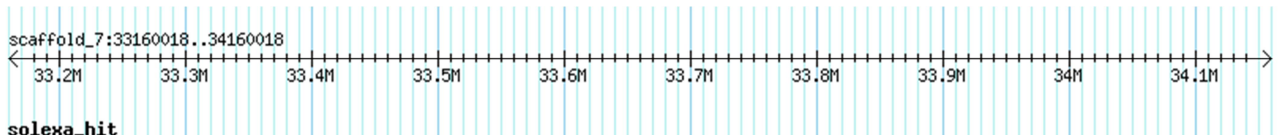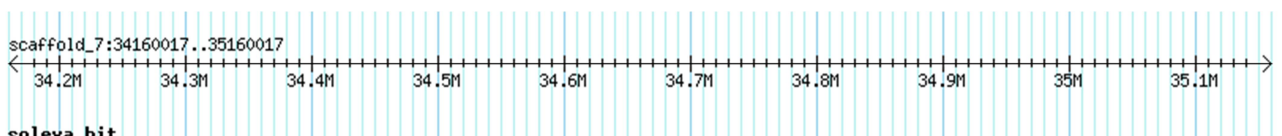

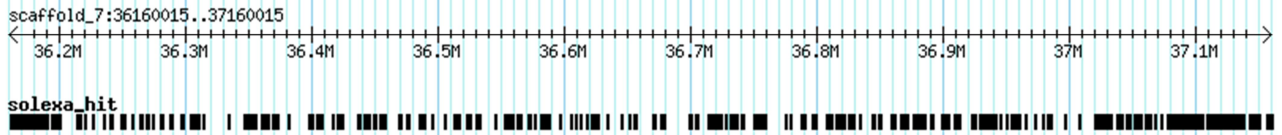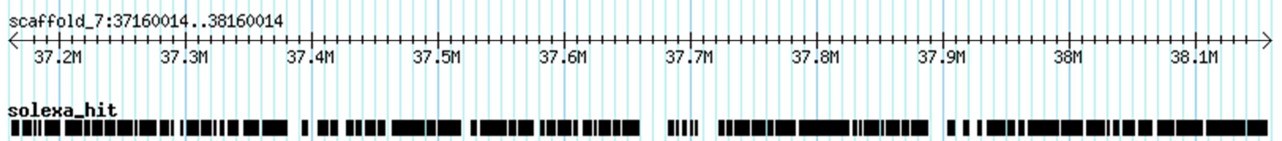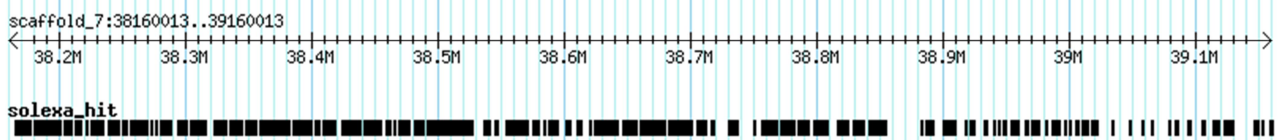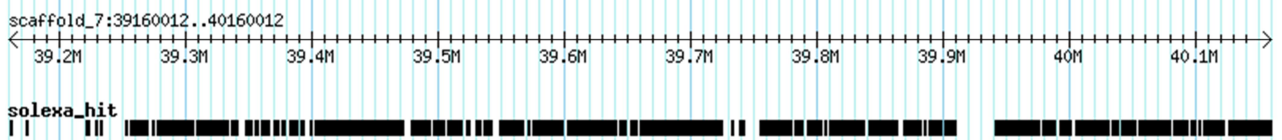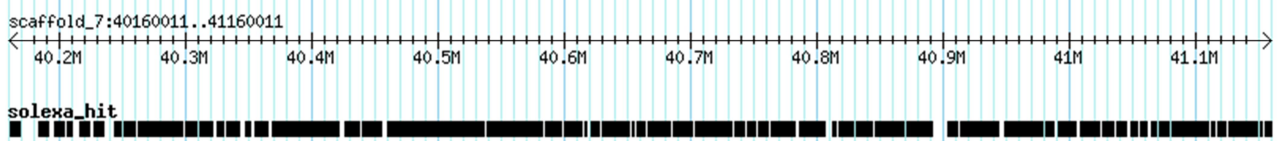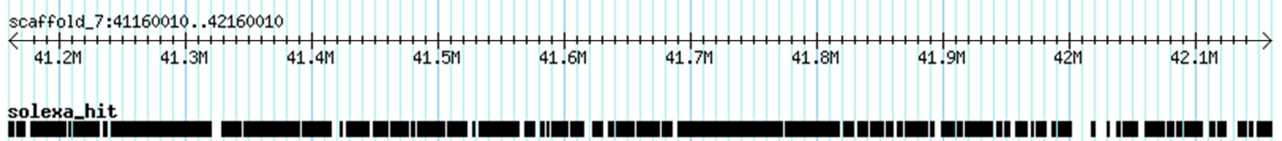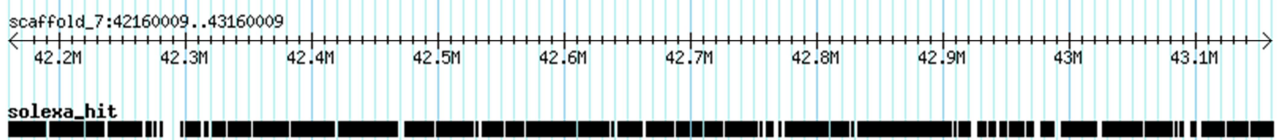

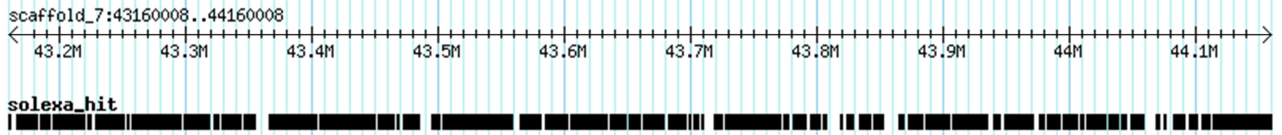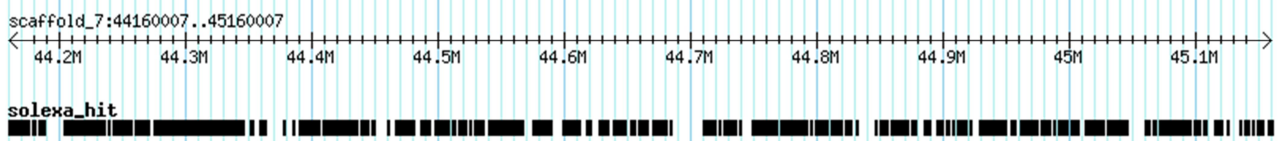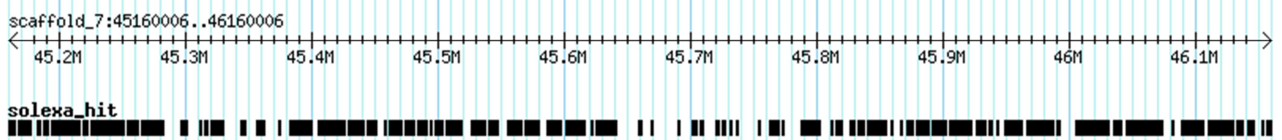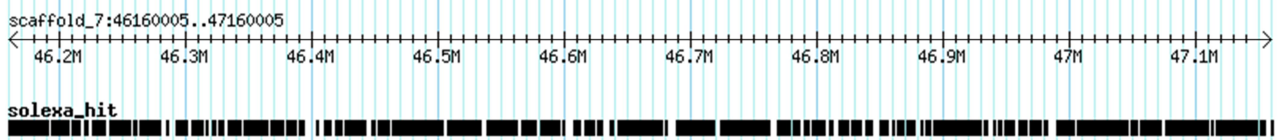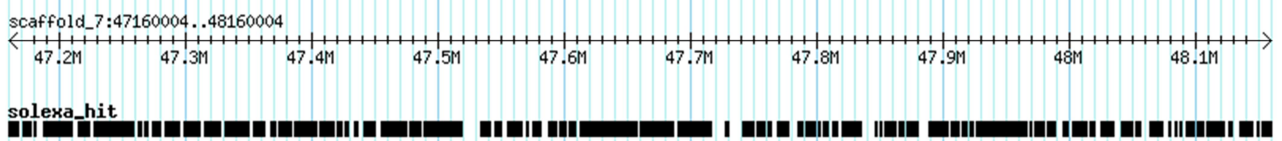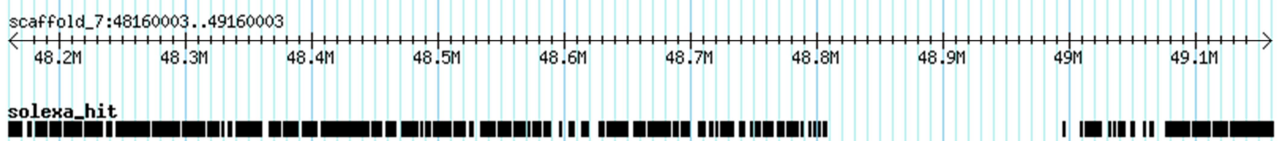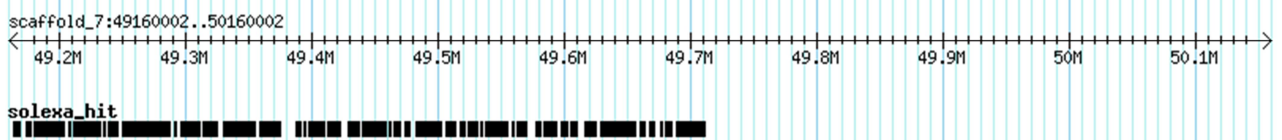

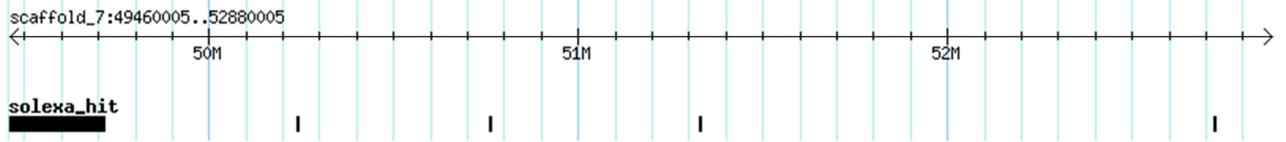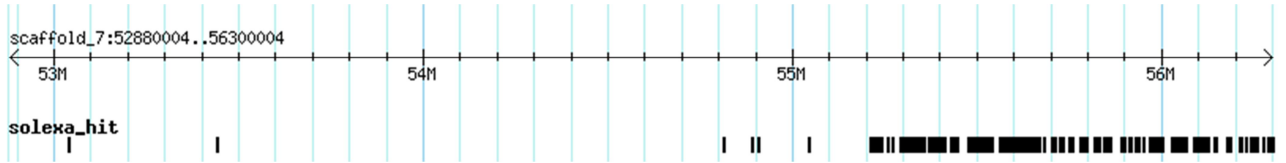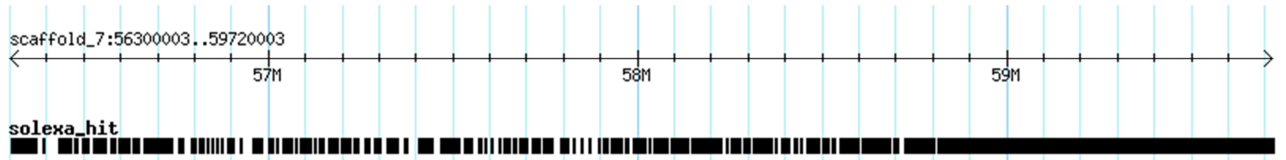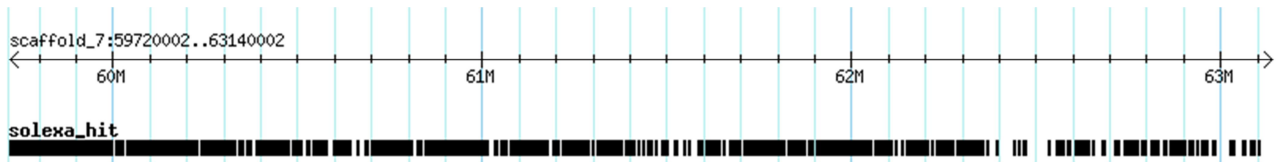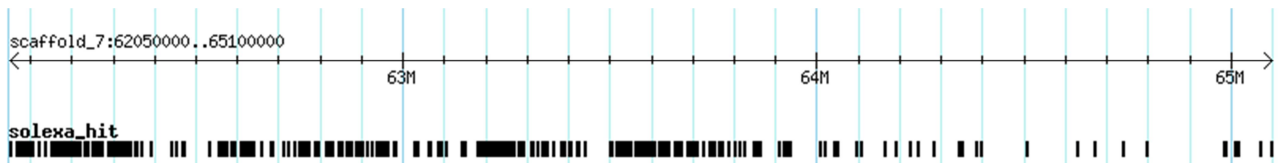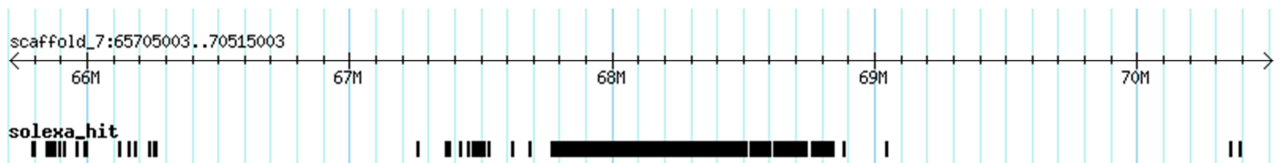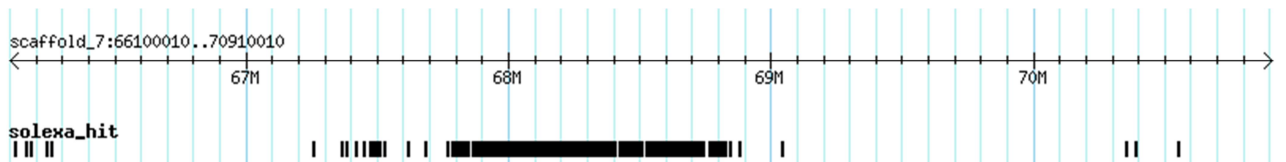



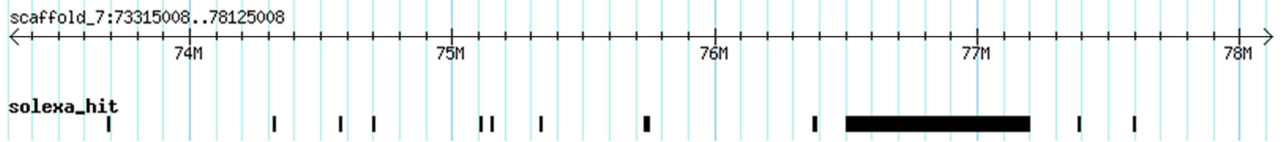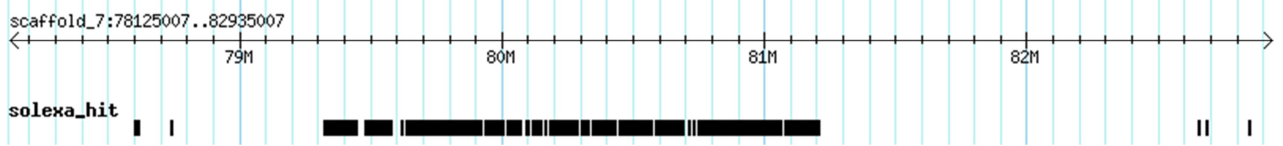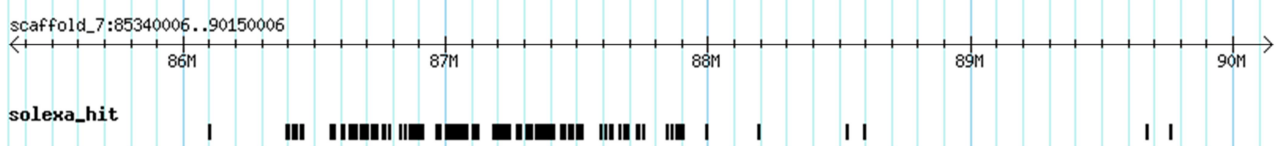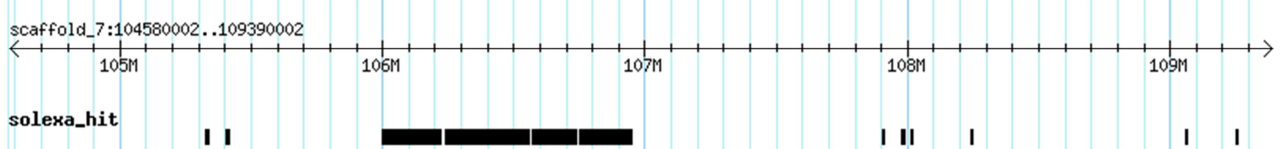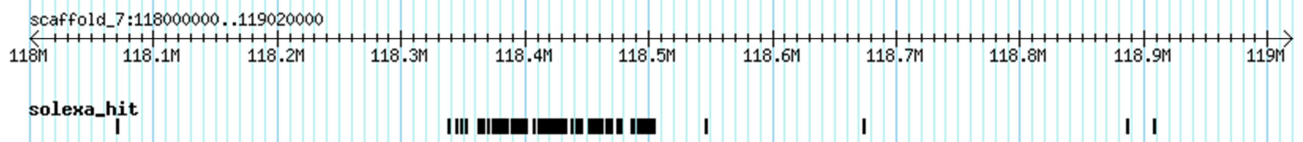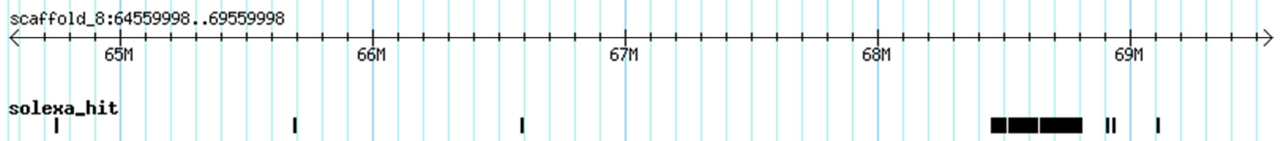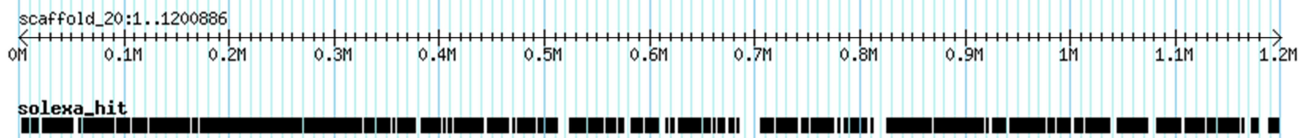

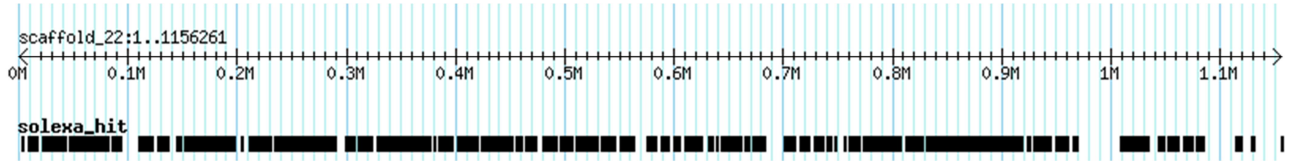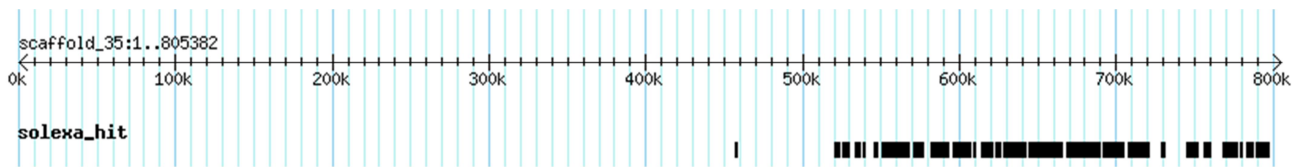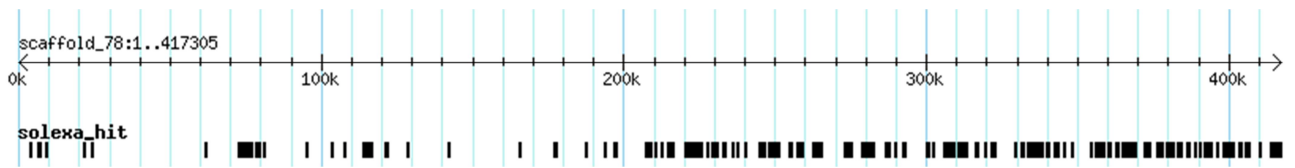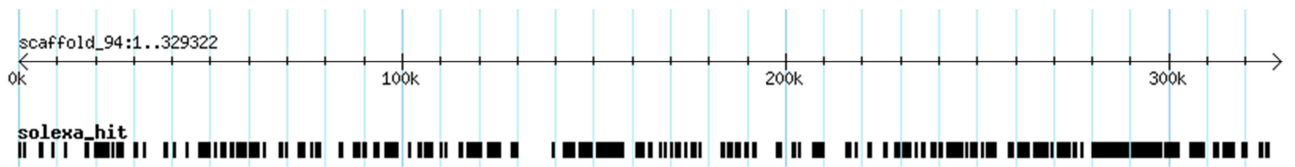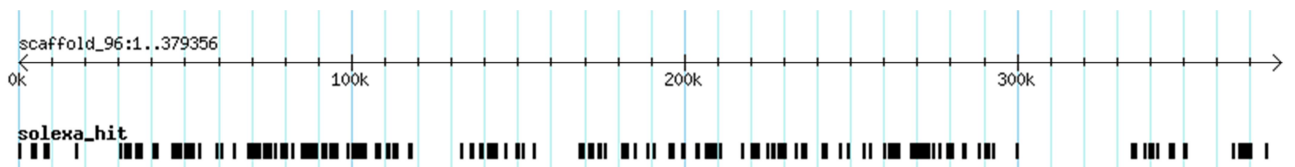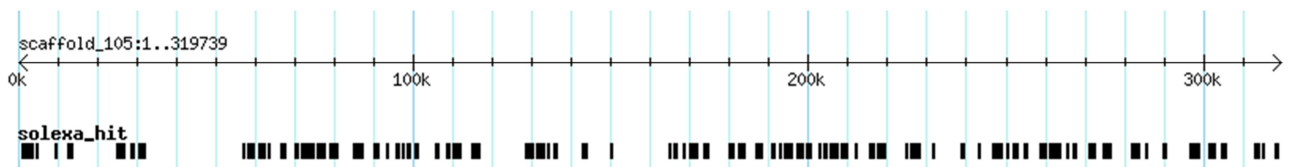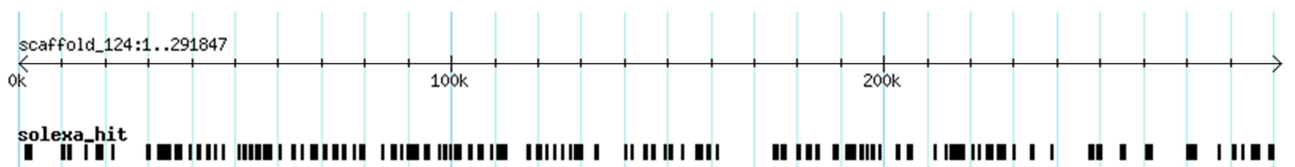

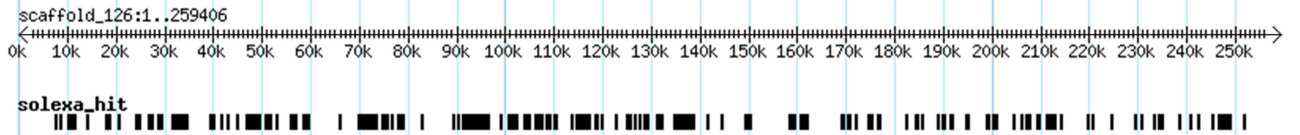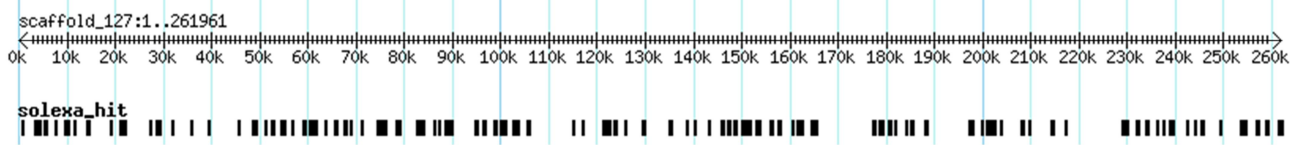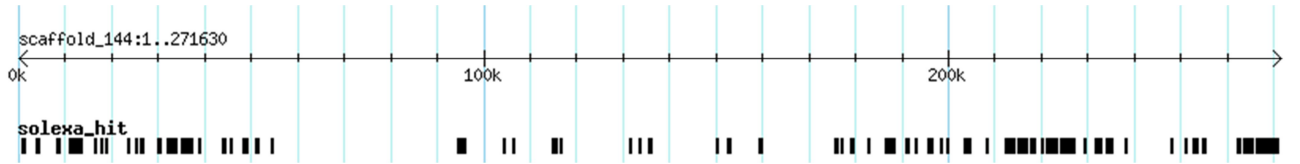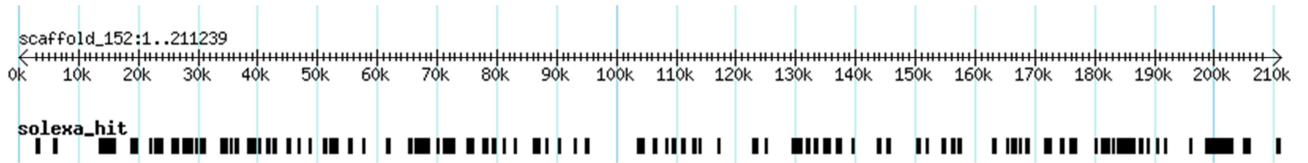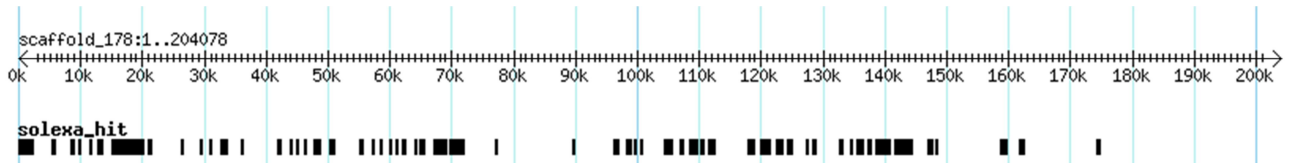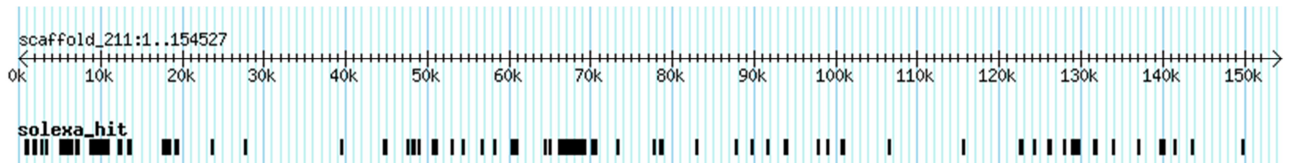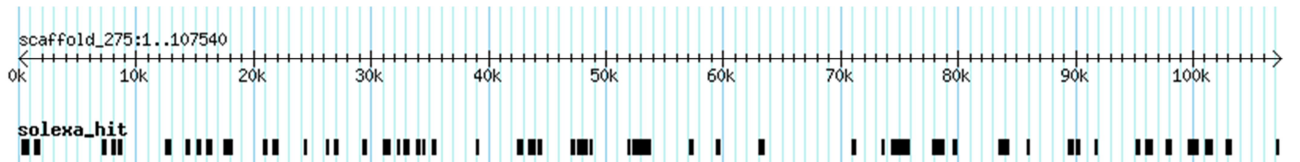

Supplement: 1471-2164-14-357-S6.pdf [file 1471-2164-14-357-S6.pdf]
